# Supplementary material for: Selective deintercalation of apex over face-shared oxide ions in the topotactic reduction of Sr7Mn4O15 to Sr7Mn4O12Electronic Supplementary Information (ESI) available: synthetic, thermogravimetric and crystallographic details for Sr7Mn4O12. See http://www.rsc.org/suppdata/cc/b3/b312792c/
Source: Royal Society of Chemistry journal article supplement (doi:10.1039/b312792c), 2004-01-01
Supplement: b312792c.doc [file b312792c.doc]

Supplementary Material for Chemical Communications

This journal is © The Royal Society of Chemistry 2003

**Supplementary information**

Crystallographic data

| Sr7Mn4O12  P 21/c *a* = 6.954(1)Å, *b* = 9.674(2)Å, *c* = 10.041(2)Å, = 93.317(4)   89.98(3) mass percent | | | | | |
| --- | --- | --- | --- | --- | --- |
| Atom | Wych. | *x* | *y* | *z* | Uiso­ (Å2) |
| Sr 1 | 4e | 0.9938(5) | 0.1862(4) | 0.4641(3) | 0.0067(3) |
| Sr 2 | 4e | 0.3318(5) | 0.1432(3) | 0.2065(3) | 0.0067(3) |
| Sr 3 | 2d | 0.5 | 0 | 0.5 | 0.0067(3) |
| Sr 4 | 4e | 0.1528(1) | 0.0130(3) | 0.8249(3) | 0.0067(3) |
| Mn 1 | 4e | 0.5874(8) | 0.1693(7) | 0.9300(5) | 0.004* |
| Mn 2 | 4e | 0.7700(7) | 0.1679(6) | 0.7301(5) | 0.004* |
| O 1 | 4e | 0.6795(7) | 0.1634(4) | 0.3321(5) | 0.0048(3) |
| O 2 | 4e | 0.5007(6) | 0.0947(4) | 0.7373(4) | 0.0048(3) |
| O 3 | 4e | 0.3343(5) | 0.2269(4) | 0.9761(3) | 0.0048(3) |
| O 4 | 4e | 0.8147(4) | 0.0698(4) | 0.9329(4) | 0.0048(3) |
| O 7 | 4e | 0.0071(7) | 0.2506(4) | 0.7133(4) | 0.0048(3) |
| O 8 | 4e | 0.8481(6) | 0.0237(4) | 0.6286(4) | 0.0048(3) |

*Uiso for manganese fixed at 0.004 Å2, all other Uiso values constrained by element

Atom labelling according to the scheme in Figure 2.

| SrO  F m -3 m *a* = 5.143(1)Å  10.02(3) mass percent | | | | | |
| --- | --- | --- | --- | --- | --- |
| Atom | Wych. | *x* | *y* | *z* | Uiso­ (Å2) |
| Sr | 4a | 0 | 0 | 0 | 0.0169(8)* |
| 0 | 4b | 0.5 | 0.5 | 0.5 | 0.0169(8)* |

*Uiso values constrained to be the same for Sr and O.

The background in each of the three data histograms was modelled using 16-parameter shifted Chebyshev functions.

Combined 2 for all three data sets = 2.598

Molar ratio of Sr7Mn4O12:SrO is 1:1.127 meaning that 13.8 mole percent of the strontium in the sample is in the form of SrO.


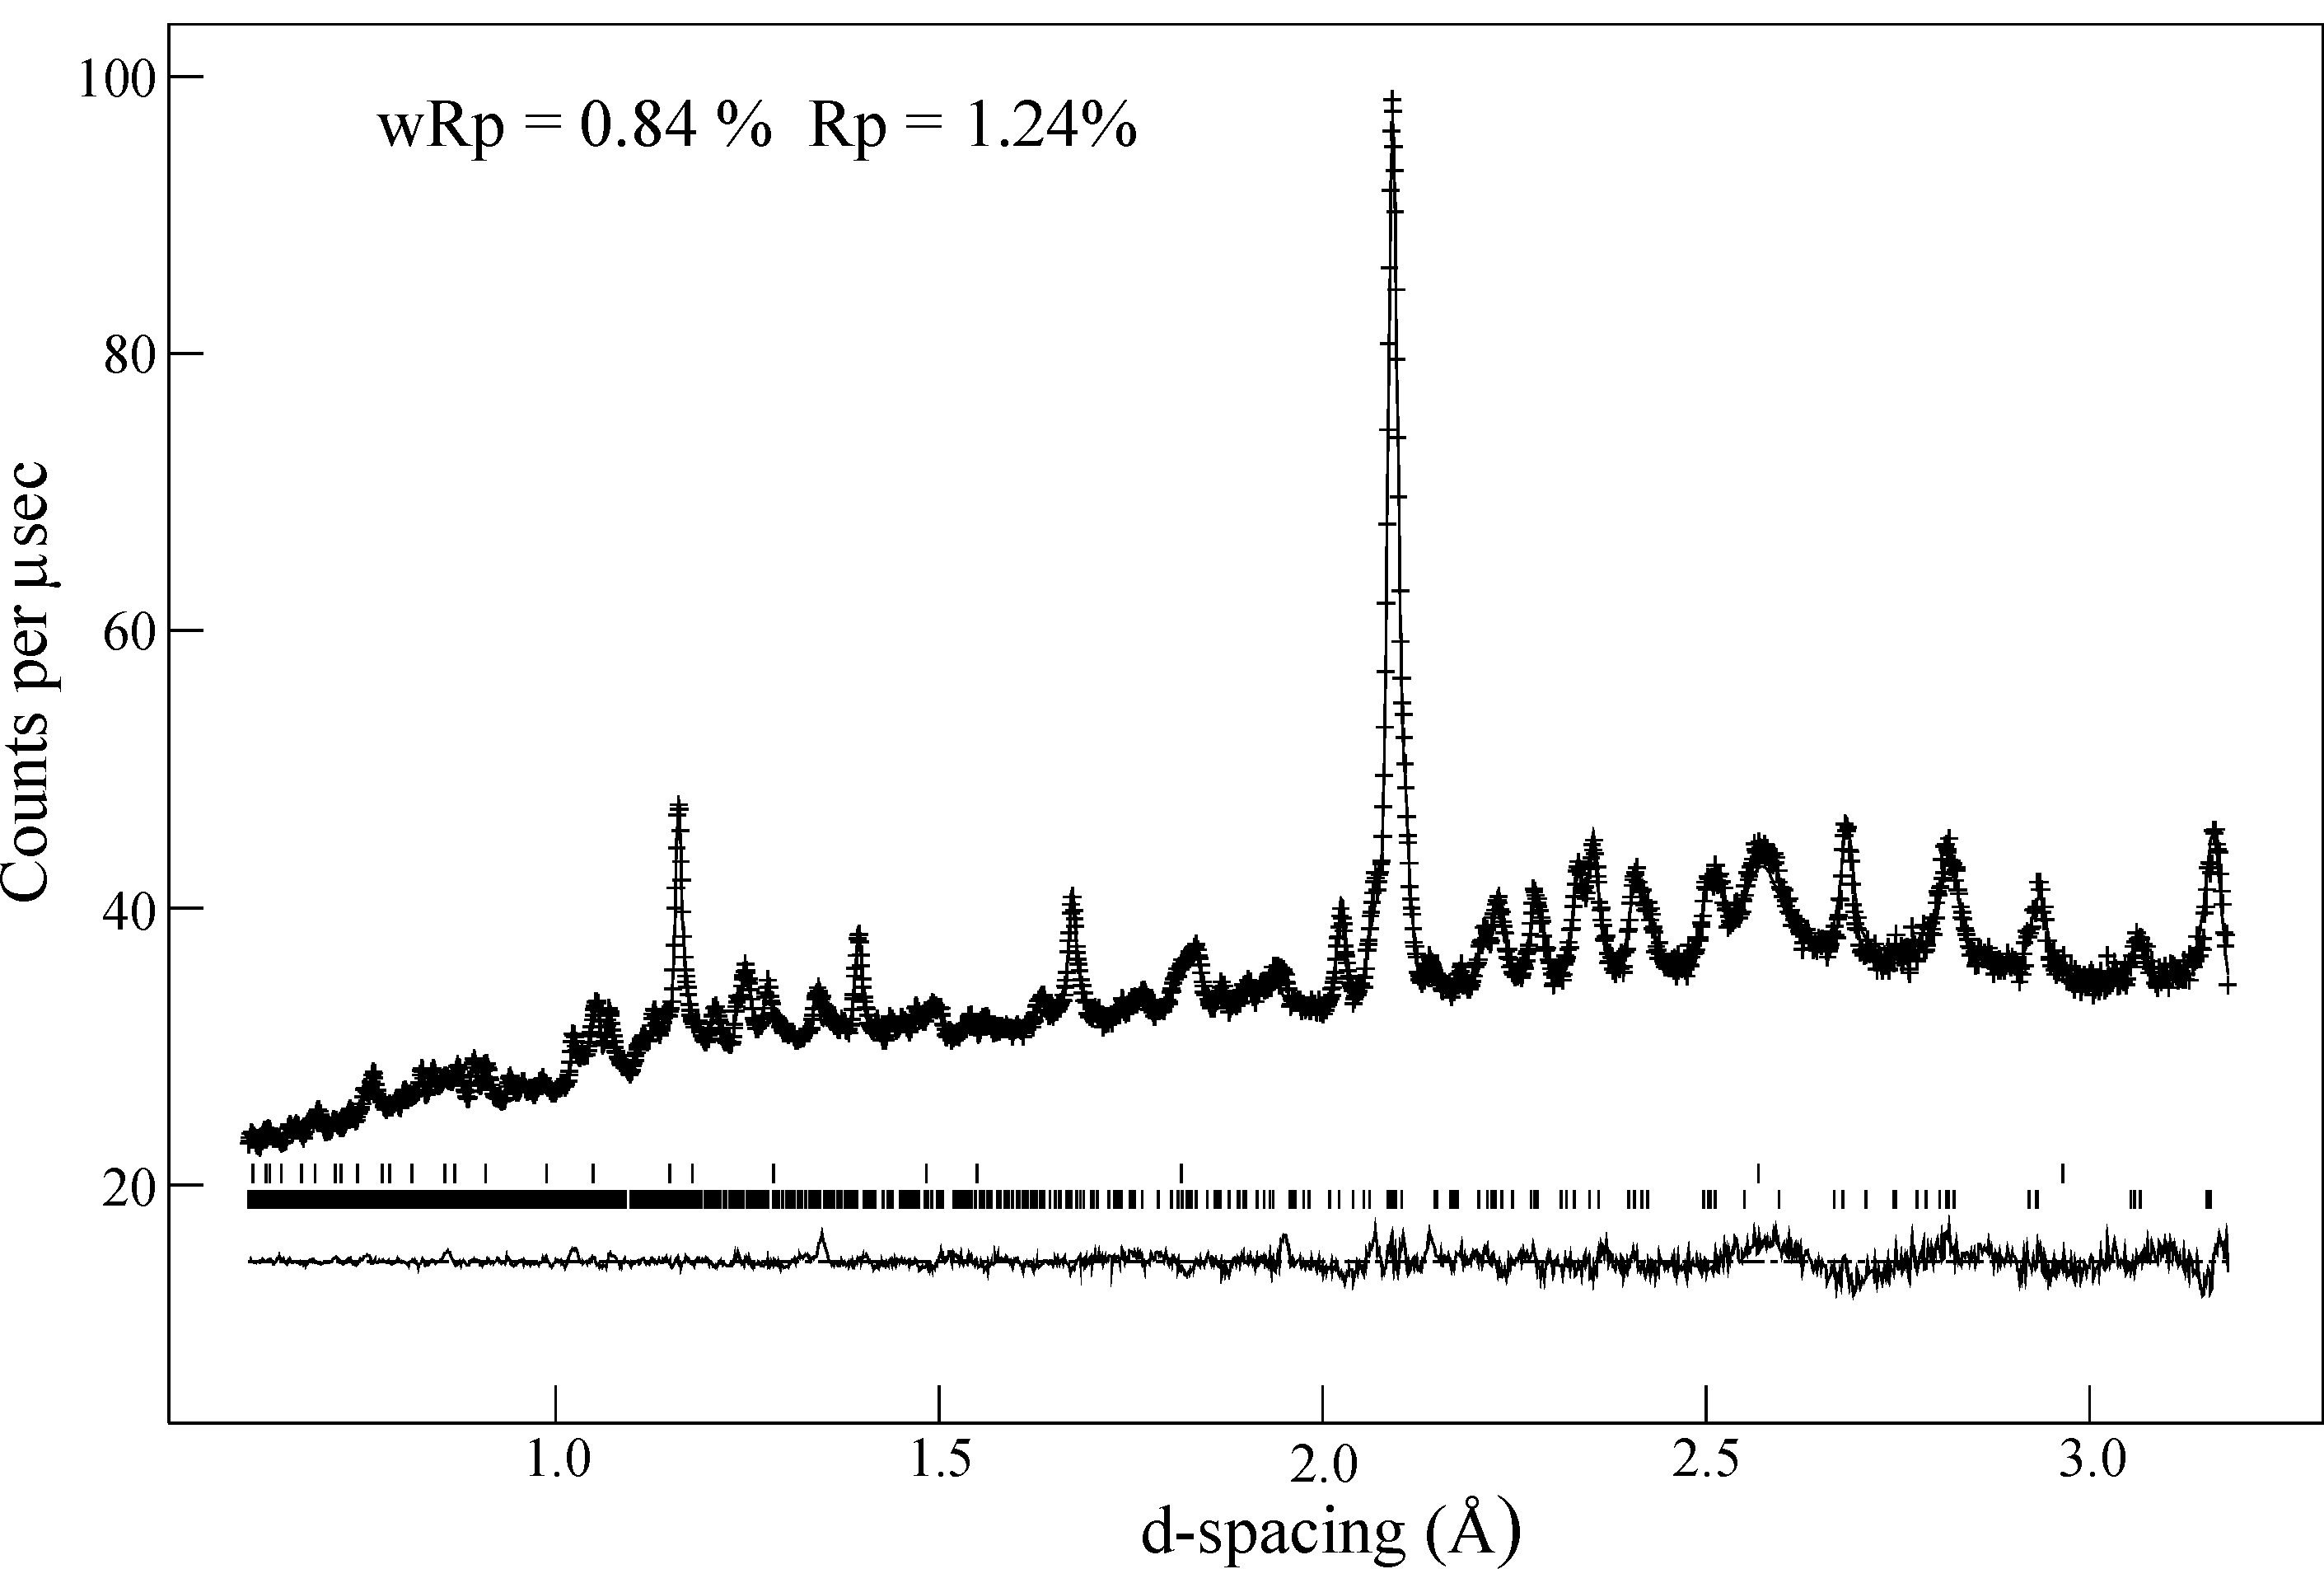


Figure 1S: Observed (crosses), calculated (line) and difference (lower line) plots for the structural refinement of Sr7Mn4O12 against powder neutron diffraction data in the d-spacing range 1 - 8Å


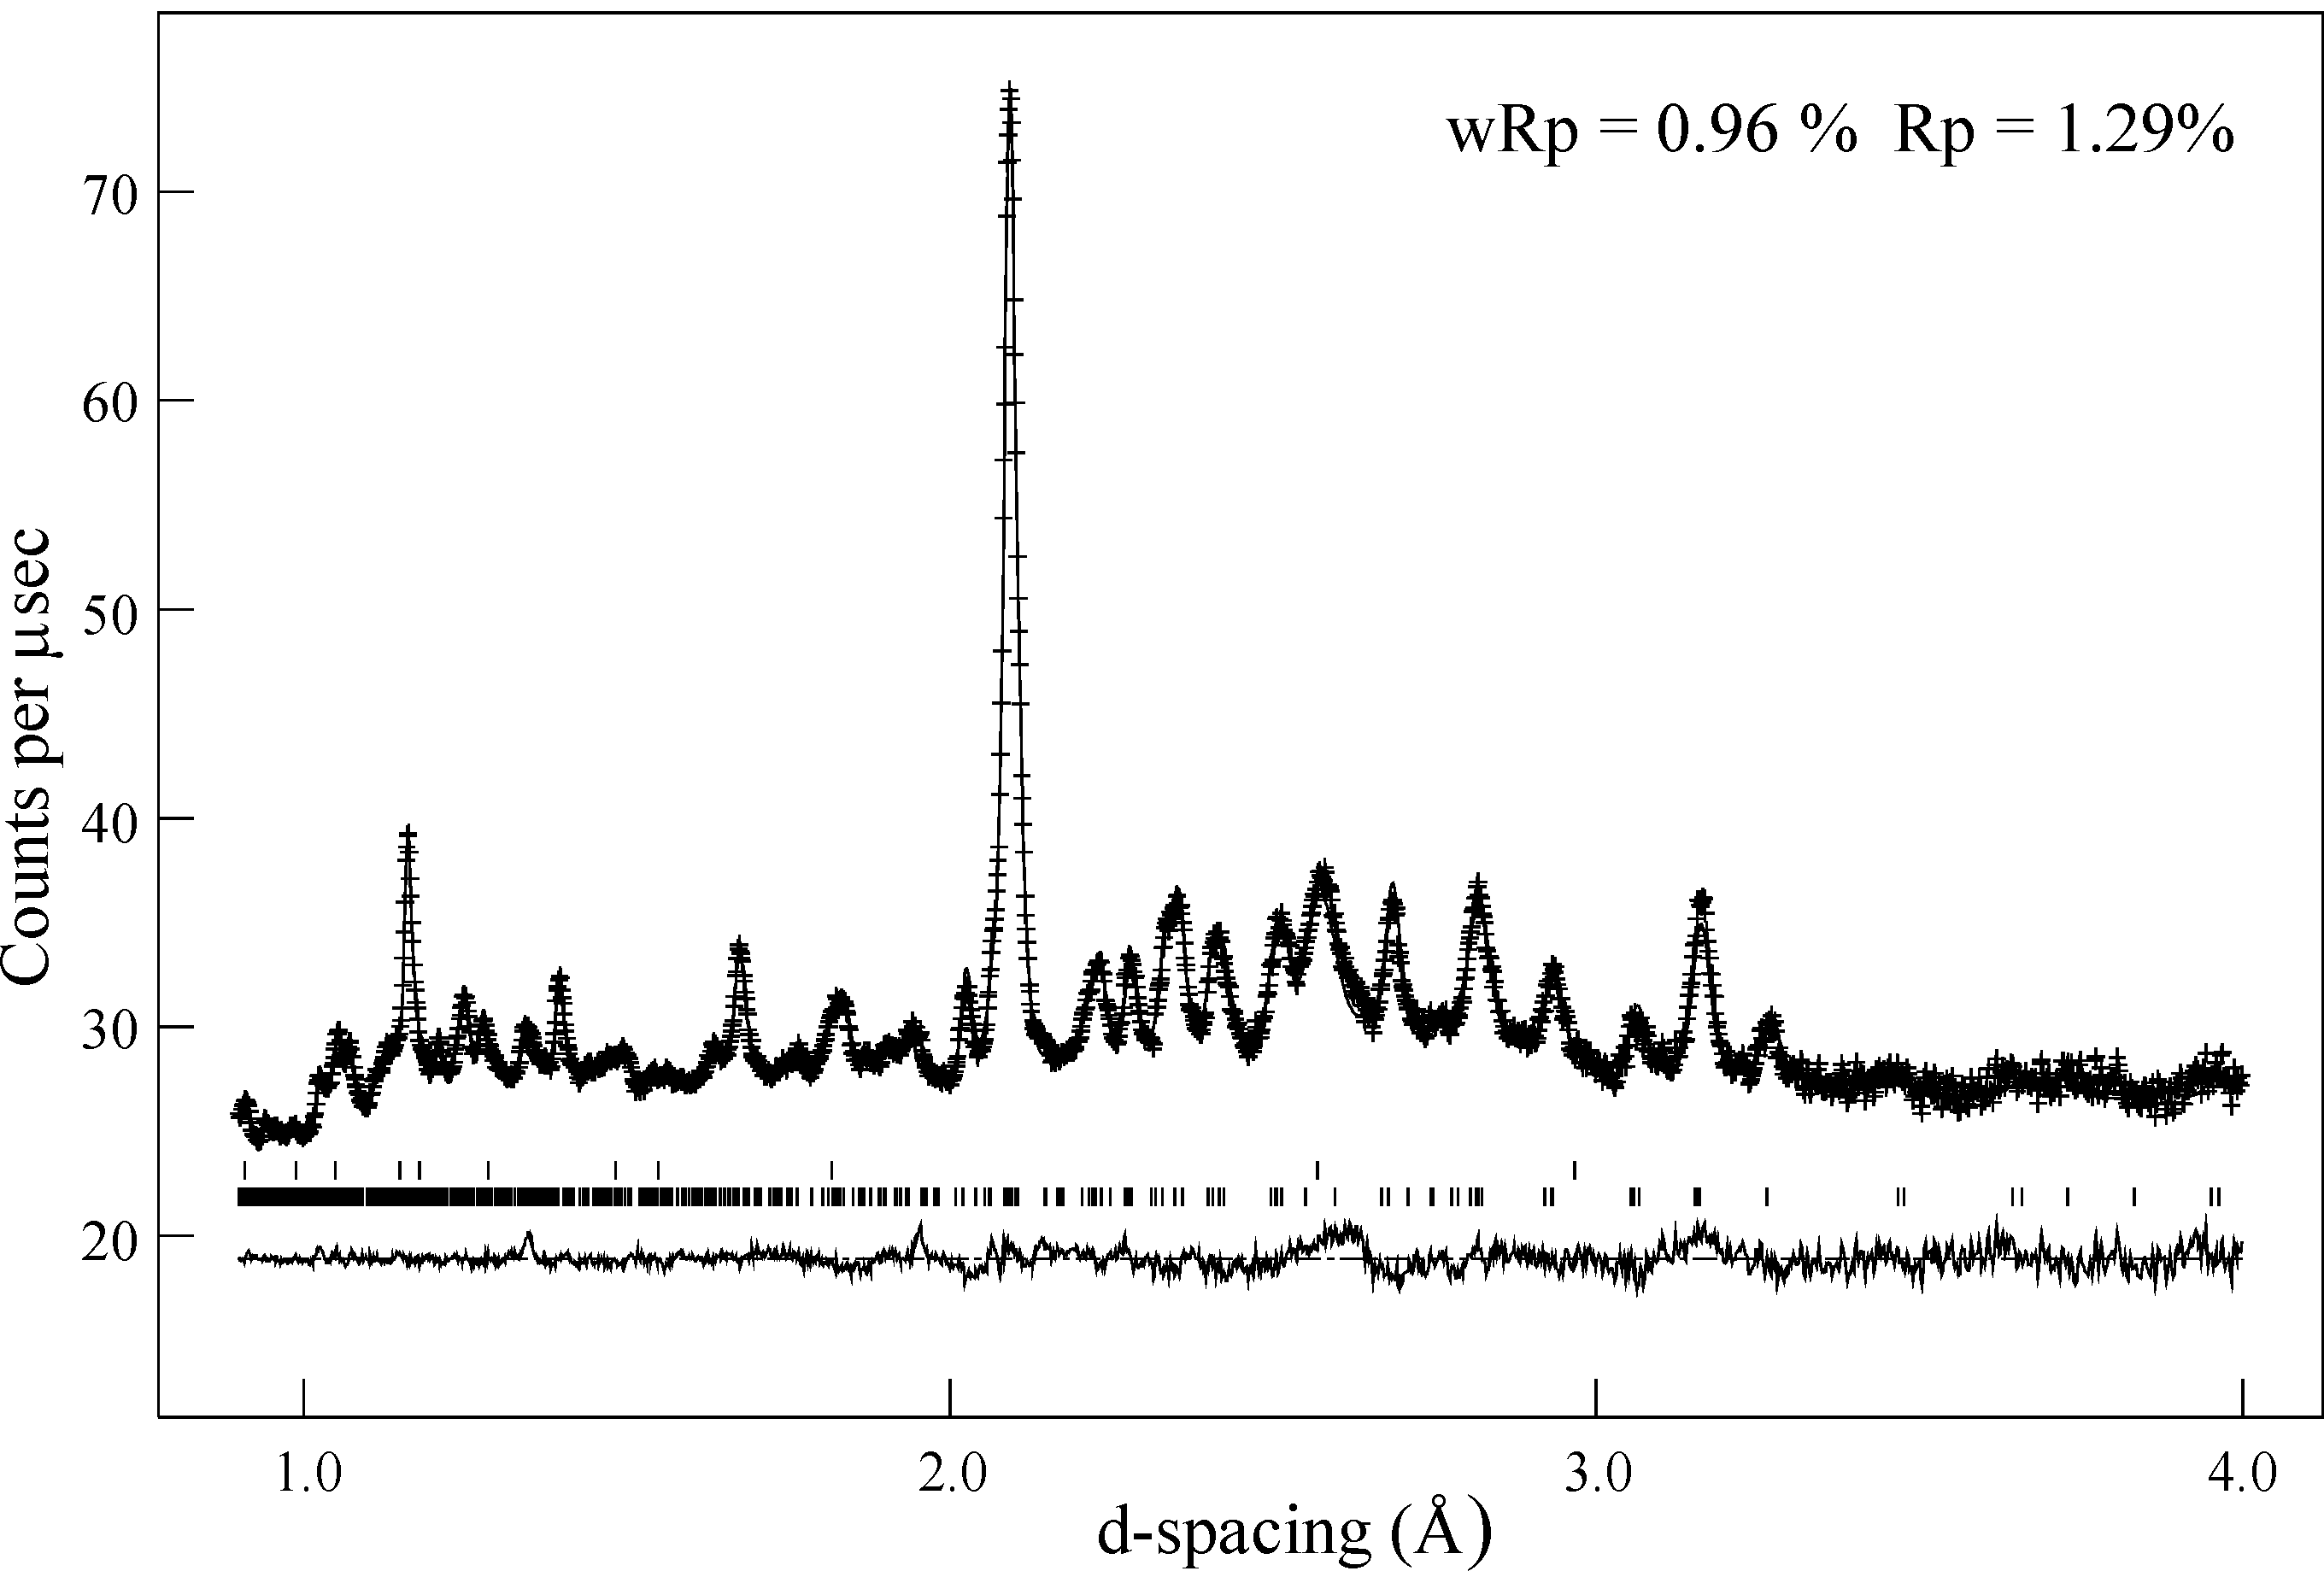


Figure 2S: Observed (crosses), calculated (line) and difference (lower line) for the structural refinement of Sr7Mn4O12 against powder neutron diffraction data in the d-spacing
range 0.8 - 4Å


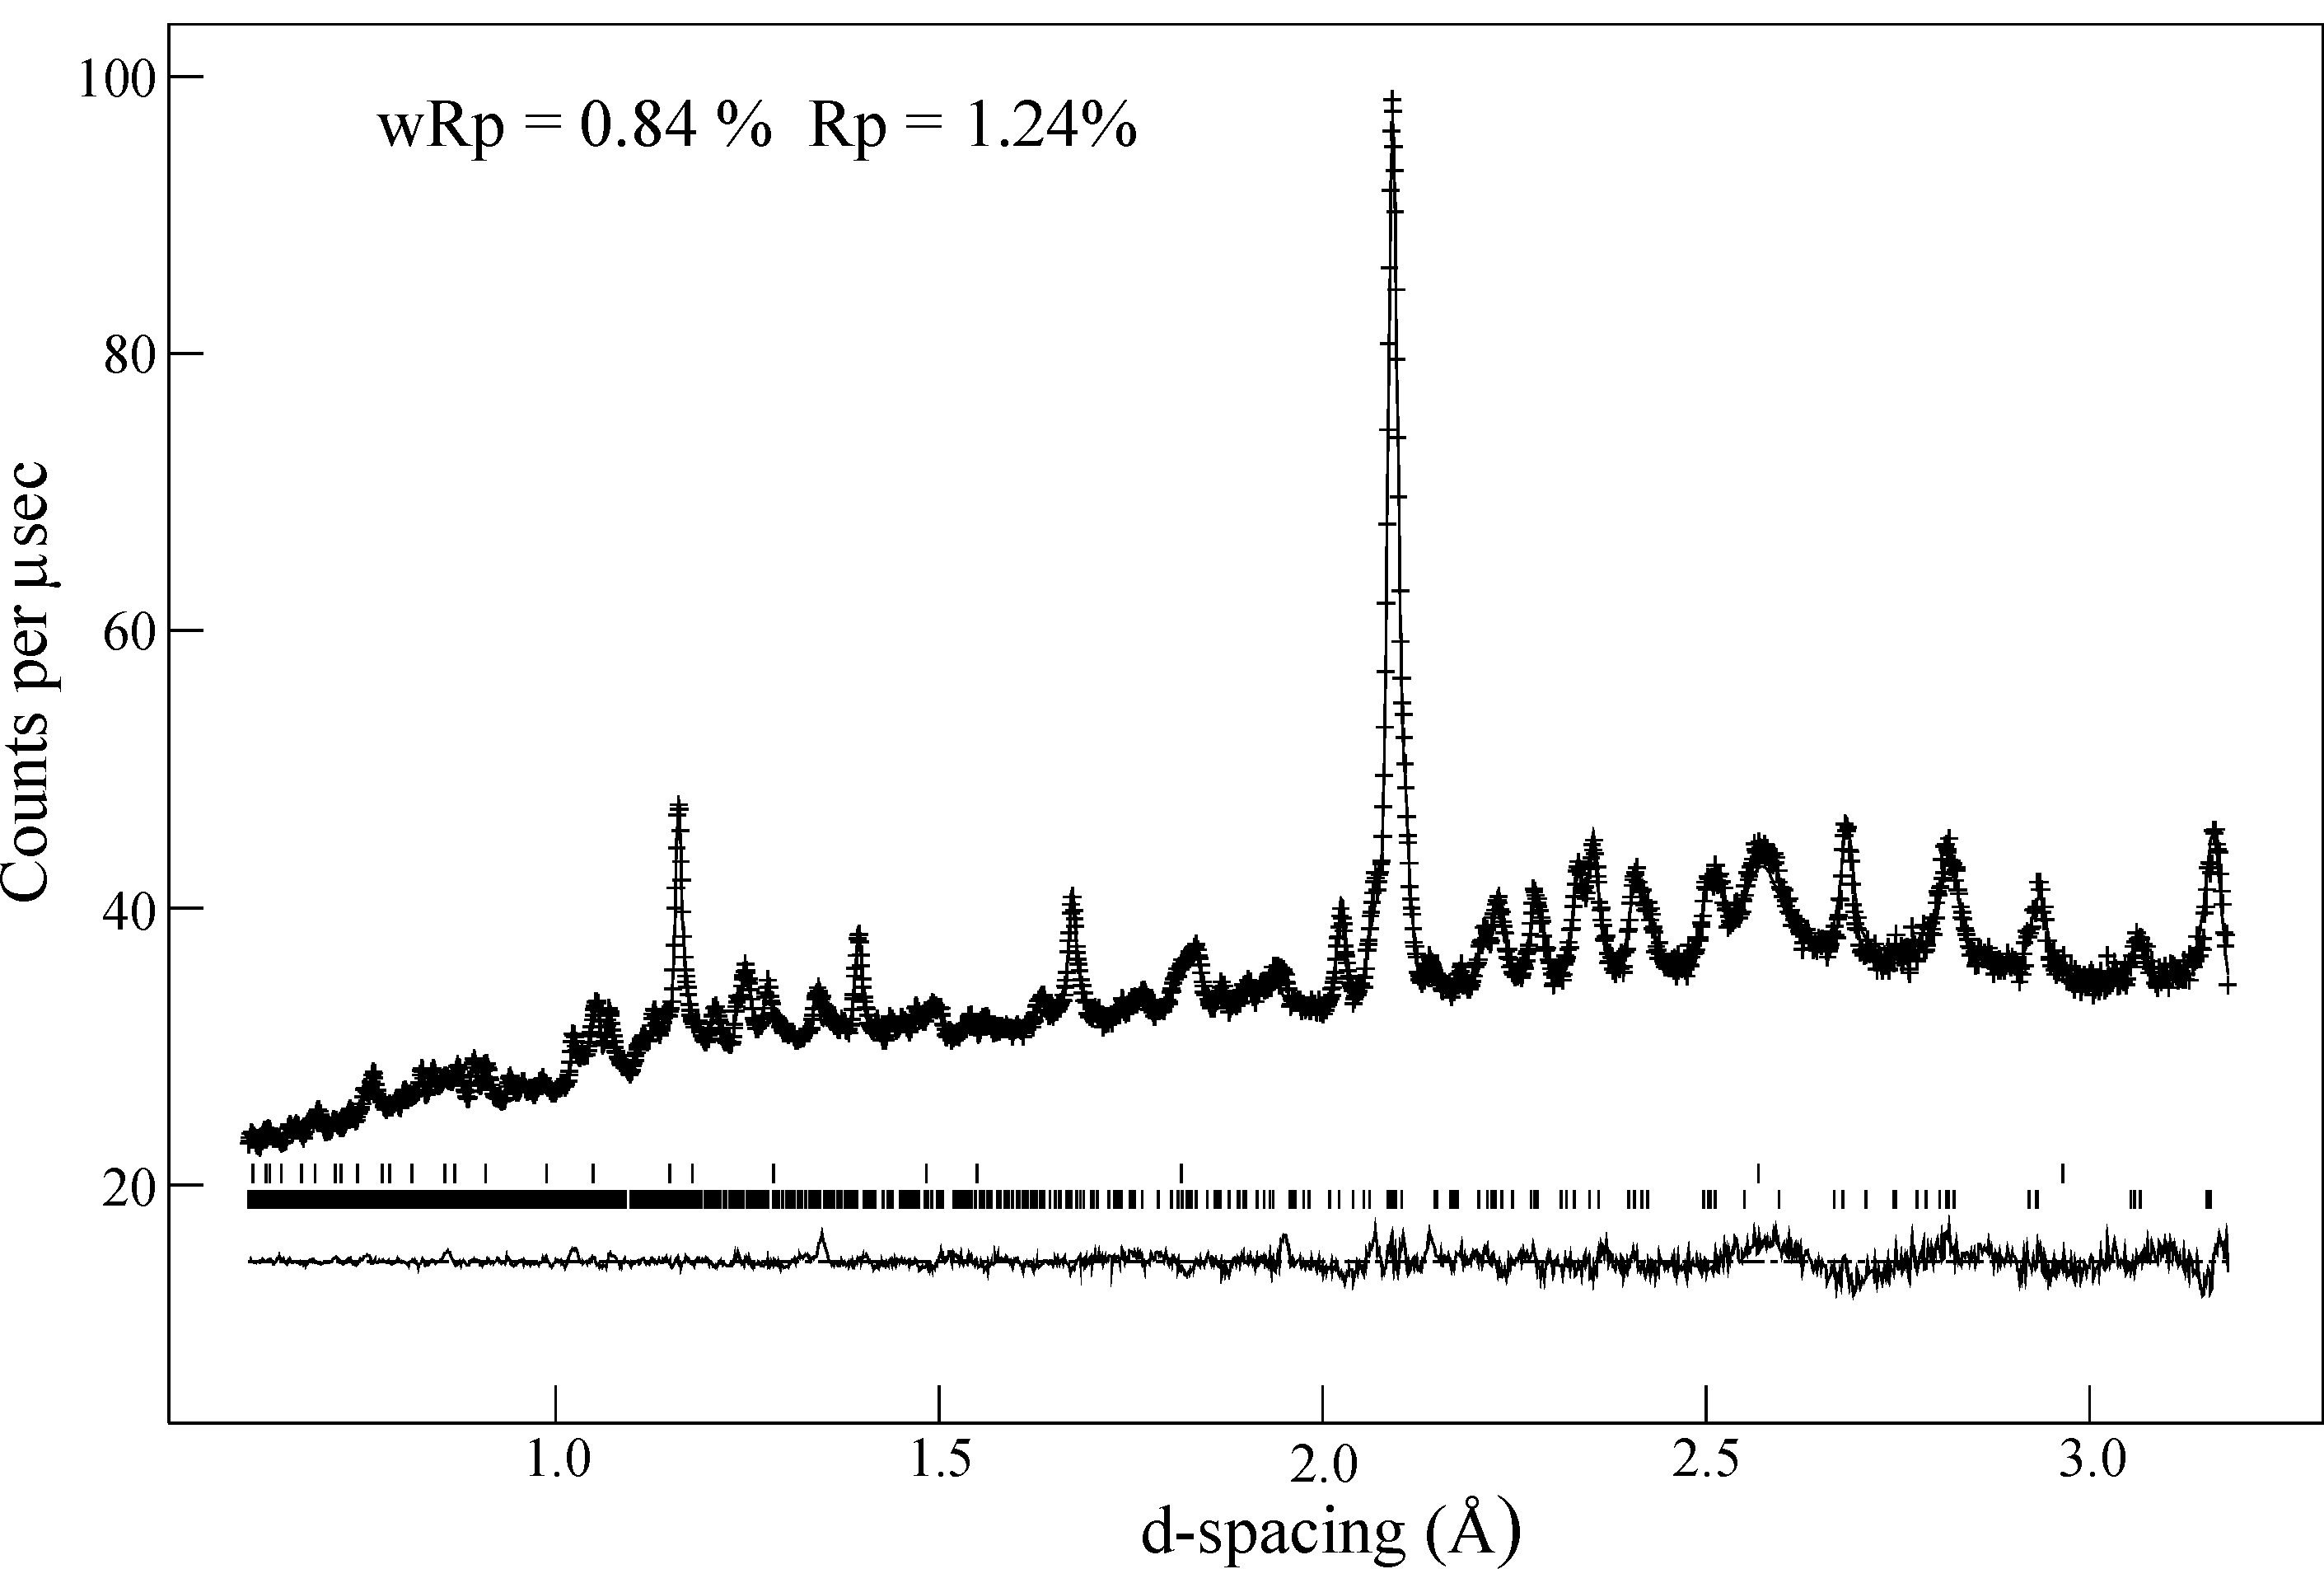


Figure 3S: Observed (crosses), calculated (line) and difference (lower line) for the structural refinement of Sr7Mn4O12 against powder neutron diffraction data in the d-spacing
range 0.5 – 3.5Å

Synthetic details

5g Sr7Mn4O15 was prepared by heating a suitable ratio of SrCO3 (99.994% Alfa Aesar) and MnO2 (99.999% Alfa Aesar) for 1 day at 800C in air. The sample was the ground and pressed into 13mm pellets at a pressure of 5 tonnes and heated at 1000 C (1 day), 1200 C (2 days) and 1300C (8 days) with regular regrindings until it was observed to be a single well crystallized phase by X-ray powder diffraction. The resulting sample was finely ground and thoroughly mixed with NaH (>99% Aldrich) in an argon glove box. The mixture was then sealed in an evacuated pyrex ampoule (p < 2×10-4 torr) and heated at 190C (2 days), 200 (2days) and 210C (2days) with intermediate regrindings under argon. The sample was then washed with methanol 6 aliquots of 40ml methanol under dry nitrogen in a filter Schlenk apparatus before being pumped to dryness.

Thermogravimetric reoxidation data

A portion of the sample (~50mg) was heated at 5C min-1 under a flow of oxygen in a thermogravimetric balance to regenerate the fully oxidized starting material Sr7Mn4O15 (confirmed by X-ray powder diffraction). The data shown in figure 4S a consistent with the expected mass gain of Sr7Mn4O12  and 10.02 mass percent SrO.

Figure 4S: Thermogravimetric reoxidation data for Sr7Mn4O12.00(3)
